Anesthesiology  
79:404, 1993  
© 1993 American Society of Anesthesiologists, Inc.  
J. B. Lippincott Company, Philadelphia

## Euthanasia in the Intensive Care Unit

*To the Editor:*—In their article, Truog and Berde<sup>1</sup> adopted the subtle distinction between “nonvoluntary” euthanasia (according to a surrogate’s decision) and “involuntary” euthanasia (without a competent person’s consent). They further stated that involuntary euthanasia has no ethical merit. Though everyone is (and should be) concerned about possible abuses, I personally find these clear-cut statements too short, especially when they apply to the incompetent, terminally ill patient.

In the intensive care unit (ICU), the decision to forgo treatment often involves patients who are comatose because of extensive brain damage or diffuse encephalopathy. In these circumstances, the distinction between the withdrawal of life support and/or the administration of large doses of sedative agents generally becomes tenuous. As an example, rather than wean from the respirator a patient who cannot breathe spontaneously (terminal weaning) and then administer opioids to relieve discomfort, is it not more appropriate medically to administer the medications while maintaining mechanical ventilation, so as to avoid any possible discomfort? This could be a matter of personal opinion.

An inquiry among European intensivists revealed that 36% (87 of 242) of the responders practiced euthanasia in patients with no real chance of recovering a meaningful life. Euthanasia was practiced more commonly by younger doctors; it was practiced less commonly in the South of Europe (and, in general, by Catholic rather than by non-Catholic physicians); but it was not more common in the Netherlands than in other European countries.<sup>2</sup>

Thus, euthanasia is practiced regularly in many ICUs for patients who did not explicitly request it. An important question is whether the surrogates should be involved in these decisions. Many European

intensivists would say no, because the surrogates lack the appropriate medical knowledge and expertise. Moreover, these decisions may raise deep feelings at a later time. Many believe that the physician can represent the patient’s best interests without seeking a surrogate’s approval.<sup>3</sup>

May I emphasize that what American courts decide as acceptable is not necessarily what is universally appropriate on ethical grounds. In more general terms, legal issues and ethical issues should be kept distinct.

**Jean-Louis Vincent, M.D., Ph.D.**  
Department of Intensive Care  
Erasmé University Hospital  
Free University of Brussels  
Route de Lennik 808  
B-1070 Brussels, Belgium

### References

1. Truog RD, Berde CB: Pain, euthanasia, and anesthesiologists. *ANESTHESIOLOGY* 78:353–360, 1993
2. Vincent JL: European attitudes towards ethical problems in intensive care medicine: Results of an ethical questionnaire. *Intensive Care Med* 16:256–264, 1990
3. Vincent JL: Limiting therapy in the hopelessly ill patient: European attitudes, *Principles of Critical Care*. Edited by Hall JB, Schmidt GA, Wood LDH. New York, McGraw-Hill, 1992, pp 2203–2204

(Accepted for publication May 6, 1993.)

Anesthesiology  
79:404–405, 1993  
© 1993 American Society of Anesthesiologists, Inc.  
J. B. Lippincott Company, Philadelphia

*In Reply:*—Our purpose was to write a balanced critique of the euthanasia movement in the United States and to emphasize that greater involvement by anesthesiologists in pain management could diminish the perceived need for legalized euthanasia. We agree with Barnette, Wendling, and Heath that legalization of assisted suicide or euthanasia would present many serious problems. We are troubled by the intolerant and dogmatic tone of these letters, however. Good

arguments and good reasons exist on both sides of this debate. Patients are legitimately concerned about the lack of attention that medicine has paid to comforting the dying. They are asking for more control over decision-making than the medical profession has been willing to give them. It is one thing to believe, as we do, that this is not the time to legalize euthanasia. It is quite another to refuse to acknowledge the reasonableness of those who believe otherwise. To do so is

## CORRESPONDENCE

to risk the misunderstandings and polarization that have characterized the abortion issue.

Vincent points out that the distinction between active and passive euthanasia is fuzzy. As others have emphasized,<sup>1</sup> perhaps the fundamental question in the euthanasia debate is not whether our actions are "killing" (active) *versus* "allowing to die" (passive) but, rather, who is making the choice. As we move down the slippery slope from individuals choosing death for themselves to others choosing death for them, the ethical justifications become more difficult. Vincent shows just how far the Europeans have progressed down that slope.

**Robert D. Truog, M.D.**  
**Charles B. Berde, M.D., Ph.D.**

Department of Anesthesia  
Children's Hospital  
MICU Office/Farley 517  
300 Longwood Avenue  
Boston, Massachusetts 02115

## Reference

1. Brock D: Voluntary active euthanasia. *Hastings Cent Rep* 22: 10–22, 1992

(Accepted for publication May 6, 1993.)

Anesthesiology  
79:405, 1993  
© 1993 American Society of Anesthesiologists, Inc.  
J. B. Lippincott Company, Philadelphia

## Pitfalls in Performing Meta-analysis: I

*To the Editor:*—We read with interest the meta-analysis by Sorenson and Pace<sup>1</sup> comparing the effects of regional and general anesthesia on morbidity and mortality in patients undergoing surgical repair of a femoral neck fracture. We have some concerns regarding the meta-analysis of 246 cases evaluated for the presence of deep venous thrombosis (DVT). The conclusions were based on data in the three articles by Davis *et al.*,<sup>2</sup> Davis and Laurenson,<sup>3</sup> and McKenzie *et al.*<sup>4</sup> Unfortunately, the two studies by Davis *et al.* appear to contain overlapping DVT data, as is stated in the methods section of the 1981 paper.<sup>3</sup> Also, although 132 patients were entered into the study, only 90 received labelled fibrinogen and only 76 produced "adequate scanning data" for analysis. Thus, only 116 cases (76 from Davis and Laurenson and 40 from McKenzie *et al.*) are available for analysis, not 246. If the 116 cases in the studies by Davis and Laurenson and Mackenzie *et al.* are pooled, DVT was diagnosed by <sup>125</sup>I-fibrinogen scanning or venography in 46 of 59 general anesthetic patients (78%) and 25 of 57 subarachnoid block patients (43%). This may prove to be statistically significant, and we would be interested in the results of a reanalysis of the data.

**Michael S. Higgins, M.D.**  
Fellow in Vascular and Thoracic Anesthesia  
Department of Anesthesiology and Critical Care Medicine  
The Johns Hopkins Hospital  
600 North Wolfe Street  
Baltimore, Maryland 21205

**Judith L. Stiff, M.D.**

Associate Professor  
Department of Anesthesiology and Critical Care Medicine  
The Johns Hopkins School of Medicine  
Staff Anesthesiologist  
Francis Scott Key Medical Center  
4940 Eastern Avenue  
Baltimore, Maryland 21224

## References

1. Sorenson RM, Pace NL: Anesthetic techniques during surgical repair of femoral neck fractures: A meta-analysis. *ANESTHESIOLOGY* 77: 1095–1104, 1992
2. Davis FM, Quince M, Laurenson VG: Deep vein thrombosis and anaesthetic technique in emergency hip surgery. *BMJ* 281:1528–1529, 1980
3. Davis FM, Laurenson VG: Spinal anaesthesia or general anaesthesia for emergency hip surgery in elderly patients. *Anaesth Intensive Care* 9:352–358, 1981
4. McKenzie PJ, Wishart HY, Gray I, Smith G: Effects of anaesthetic technique on deep vein thrombosis: A comparison of subarachnoid and general anaesthesia. *Br J Anaesth* 57:853–857, 1985.

(Accepted for publication May 7, 1993.)
